# Supplementary material
Source: HighWire-hosted journal article supplement (https://bmjopen.bmj.com/content/10/9/e037694)
Supplement: inline-supplementary-material-1 [file inline-supplementary-material-1.pdf]

Ambrož M et al. Changes in blood pressure thresholds for initiating antihypertensive medication in diabetes patients with diabetes. BMJ Open 2020

## Supplementary material 1

### Exclusion of patients in each calendar year

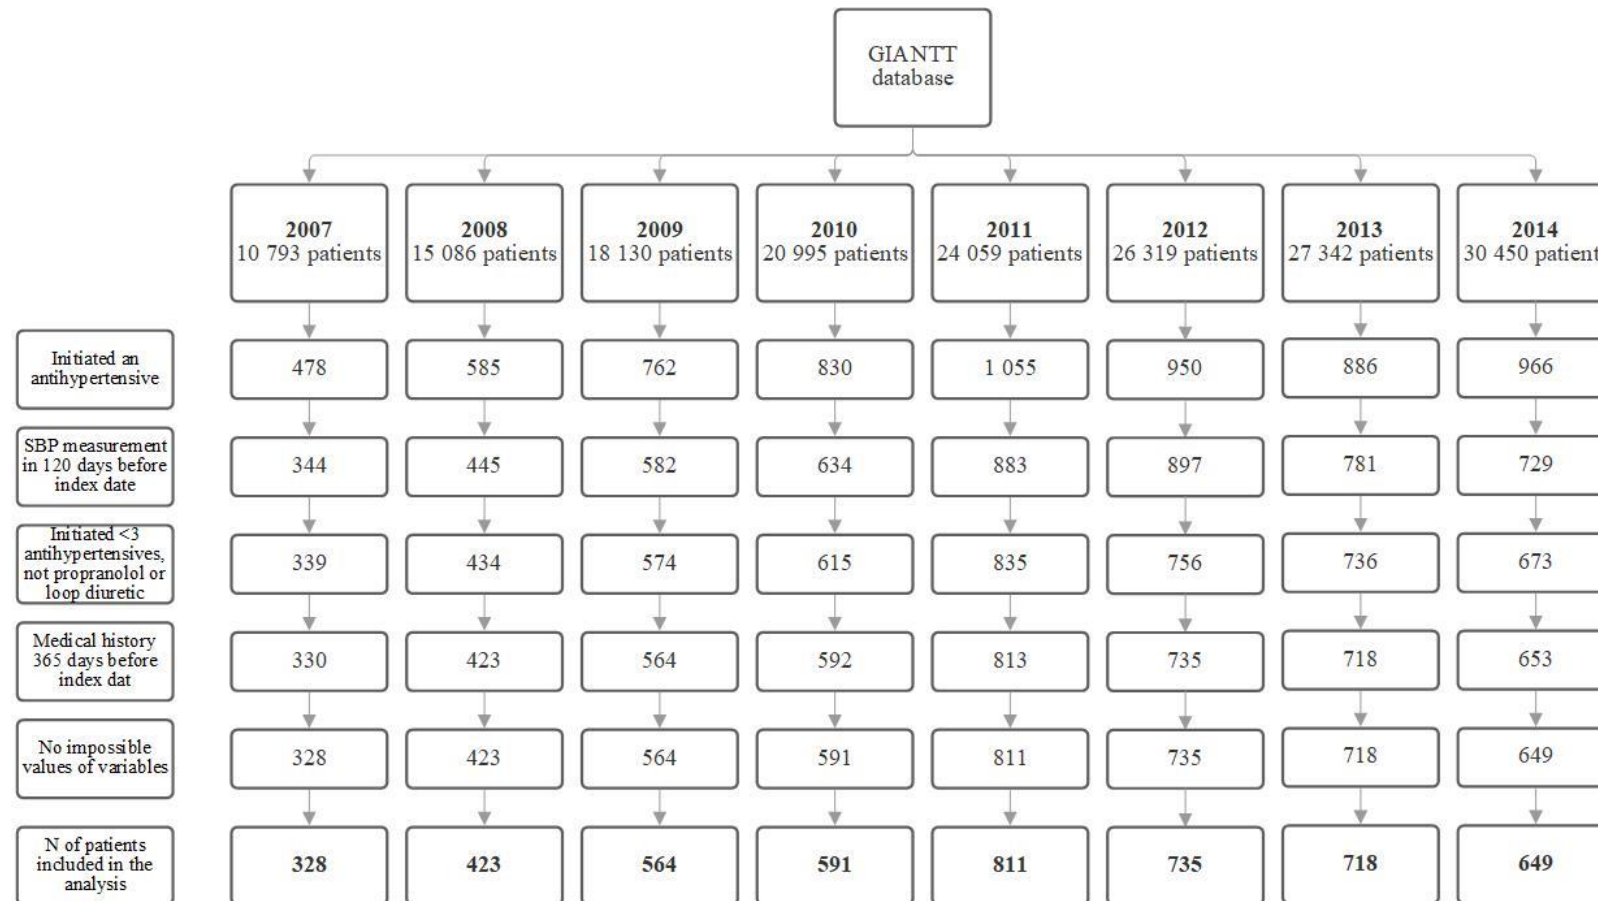

**Supplementary Figure 1:** Numbers of individuals available at each stage based on the inclusion and exclusion criteria per calendar year

Ambrož M et al. Changes in blood pressure thresholds for initiating antihypertensive medication in diabetes patients with diabetes. BMJ Open 2020

**Supplementary Table 1:** Characteristics of included patients over the years

|                                                         | <b>2007</b> | <b>2008</b> | <b>2009</b> | <b>2010</b> | <b>2011</b> | <b>2012</b> | <b>2013</b> | <b>2014</b> |
|---------------------------------------------------------|-------------|-------------|-------------|-------------|-------------|-------------|-------------|-------------|
| <b>Number of patients</b>                               | 328         | 423         | 564         | 591         | 811         | 735         | 718         | 649         |
| <b>Females; N (%)</b>                                   | 154 (47)    | 178 (42)    | 270 (48)    | 277 (47)    | 360 (44)    | 355 (48)    | 355 (49)    | 310 (48)    |
| <b>Age in years; N (%)</b>                              |             |             |             |             |             |             |             |             |
| < 60                                                    | 98 (30)     | 161 (38)    | 203 (36)    | 226 (38)    | 275 (34)    | 238 (32)    | 212 (30)    | 207 (32)    |
| 60 – 69                                                 | 111 (34)    | 139 (33)    | 199 (35)    | 189 (32)    | 282 (35)    | 237 (32)    | 241 (34)    | 187 (29)    |
| 70 - 79                                                 | 84 (26)     | 84 (20)     | 106 (19)    | 121 (20)    | 191 (24)    | 164 (22)    | 163 (23)    | 155 (24)    |
| ≥ 80                                                    | 35 (11)     | 39 (9)      | 56 (10)     | 55 (9)      | 63 (8)      | 96 (13)     | 102 (14)    | 100 (15)    |
| <b>Frailty in electronic Frailty Index score; N (%)</b> |             |             |             |             |             |             |             |             |
| Less frail: 0 – 0.03                                    | 193 (59)    | 233 (55)    | 303 (54)    | 275 (47)    | 372 (46)    | 306 (42)    | 231 (32)    | 157 (24)    |
| Medium frail: 0.06 – 0.09                               | 92 (28)     | 124 (29)    | 180 (32)    | 204 (35)    | 270 (33)    | 267 (36)    | 273 (38)    | 218 (34)    |
| More frail: 0.11 – 0.40                                 | 43 (13)     | 66 (16)     | 81 (14)     | 112 (19)    | 169 (21)    | 162 (22)    | 214 (30)    | 274 (42)    |
| <b>Systolic BP at initiation in mmHg; mean ± SD</b>     | 157 ± 22    | 157 ± 21    | 158 ± 21    | 157 ± 22    | 155 ± 21    | 154 ± 21    | 152 ± 22    | 151 ± 22    |
| <b>Diastolic BP at initiation in mmHg; mean ± SD</b>    | 86 ± 12     | 87 ± 11     | 87 ± 12     | 87 ± 11     | 86 ± 12     | 85 ± 12     | 84 ± 12     | 84 ± 13     |
| <b>Diabetes duration &lt; 2 years; N (%)</b>            | 96 (29)     | 137 (32)    | 139 (25)    | 168 (28)    | 236 (29)    | 198 (27)    | 154 (21)    | 131 (20)    |
| <b>HbA1c &lt; 7%; N (%)</b>                             | 150 (59)    | 232 (61)    | 308 (59)    | 323 (60)    | 497 (64)    | 454 (65)    | 418 (60)    | 335 (55)    |
| <b>BMI in kg/m<sup>2</sup>; N (%)</b>                   |             |             |             |             |             |             |             |             |
| < 24.9                                                  | 49 (19)     | 67 (19)     | 66 (14)     | 79 (15)     | 114 (15)    | 132 (19)    | 126 (18)    | 118 (19)    |
| 25 – 29.9                                               | 100 (39)    | 142 (39)    | 218 (46)    | 222 (42)    | 312 (40)    | 280 (40)    | 283 (41)    | 231 (38)    |
| > 30                                                    | 108 (42)    | 151 (42)    | 191 (40)    | 229 (43)    | 345 (45)    | 284 (41)    | 283 (41)    | 262 (43)    |
| <b>Dyslipidaemia; N (%)</b>                             | 92 (46)     | 161 (50)    | 232 (55)    | 269 (58)    | 418 (60)    | 403 (62)    | 366 (57)    | 322 (58)    |
| <b>eGFR ≤ 60 ml/min/1.73m<sup>2</sup>; N (%)</b>        | 37 (17)     | 45 (14)     | 69 (15)     | 44 (9)      | 70 (10)     | 93 (14)     | 100 (15)    | 84 (14)     |
| <b>Albuminuria; N (%)</b>                               | 5 (4)       | 9 (4)       | 12 (4)      | 10 (3)      | 15 (4)      | 16 (4)      | 18 (5)      | 16 (4)      |
| <b>History of cardiovascular disease; N (%)</b>         |             |             |             |             |             |             |             |             |
| Myocardial disease                                      | 11 (3)      | 21 (5)      | 16 (3)      | 21 (4)      | 31 (4)      | 50 (7)      | 55 (8)      | 58 (9)      |
| Heart failure                                           | 5 (2)       | 4 (1)       | 6 (1)       | 6 (1)       | 20 (2)      | 12 (2)      | 15 (2)      | 22 (3)      |
| Stroke                                                  | 13 (4)      | 11 (3)      | 19 (3)      | 20 (3)      | 25 (3)      | 34 (5)      | 45 (6)      | 45 (7)      |
| <b>N of chronic medication at initiation; mean ± SD</b> | 3.8 ± 2.3   | 3.3 ± 2.1   | 3.4 ± 2.4   | 3.5 ± 2.2   | 3.4 ± 2.3   | 3.7 ± 2.6   | 3.6 ± 2.5   | 4.0 ± 2.8   |

Ambrož M et al. Changes in blood pressure thresholds for initiating antihypertensive medication in diabetes patients with diabetes. BMJ Open 2020

**Glucose lowering medication at initiation; N (%)**

|                                                  |          |          |          |          |          |          |          |          |
|--------------------------------------------------|----------|----------|----------|----------|----------|----------|----------|----------|
| No medication                                    | 77 (23)  | 90 (21)  | 149 (26) | 137 (23) | 200 (25) | 228 (31) | 217 (30) | 171 (26) |
| 1 oral                                           | 129 (39) | 179 (42) | 199 (35) | 247 (42) | 363 (45) | 271 (37) | 283 (39) | 266 (41) |
| 2 oral                                           | 71 (22)  | 103 (24) | 144 (26) | 139 (24) | 161 (20) | 143 (19) | 121 (17) | 100 (15) |
| 3 oral or more and/or insulin                    | 51 (16)  | 51 (12)  | 72 (13)  | 68 (12)  | 87 (11)  | 93 (13)  | 97 (14)  | 112 (17) |
| <b>Treated with a lipid lowering drug; N (%)</b> | 219 (67) | 255 (60) | 298 (53) | 343 (58) | 447 (55) | 417 (57) | 408 (57) | 362 (56) |
| <b>Initiated drug class; N (%)</b>               |          |          |          |          |          |          |          |          |
| Renin-angiotensin-aldosterone system inhibitor   | 185 (60) | 241 (61) | 330 (63) | 319 (60) | 453 (62) | 415 (63) | 379 (60) | 323 (56) |
| Diuretic                                         | 59 (19)  | 73 (18)  | 101 (19) | 104 (20) | 123 (17) | 108 (16) | 89 (14)  | 105 (18) |
| Beta blocker                                     | 51 (17)  | 59 (15)  | 75 (14)  | 80 (15)  | 117 (16) | 93 (14)  | 116 (18) | 107 (19) |
| Calcium channel blocker                          | 14 (5)   | 22 (6)   | 21 (4)   | 29 (5)   | 32 (4)   | 40 (6)   | 44 (7)   | 38 (7)   |
| Combination of antihypertensives                 | 19 (6)   | 28 (7)   | 37 (7)   | 59 (10)  | 86 (11)  | 79 (11)  | 90 (13)  | 76 (12)  |

Ambrož M et al. Changes in blood pressure thresholds for initiating antihypertensive medication in diabetes patients with diabetes. *BMJ Open* 2020

## Supplementary material 2

Sensitivity analysis using mean of last two blood pressure measurements (N =2 947)

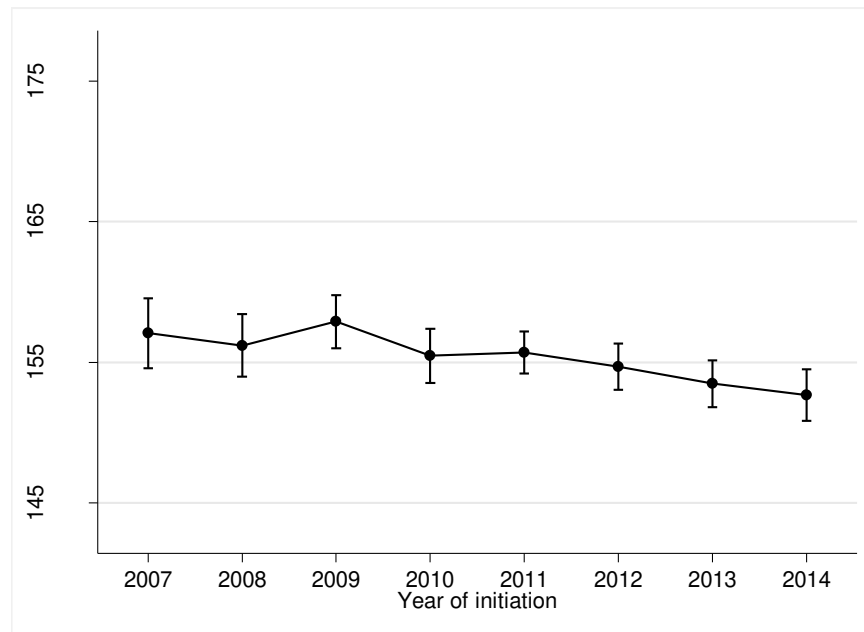

(A)

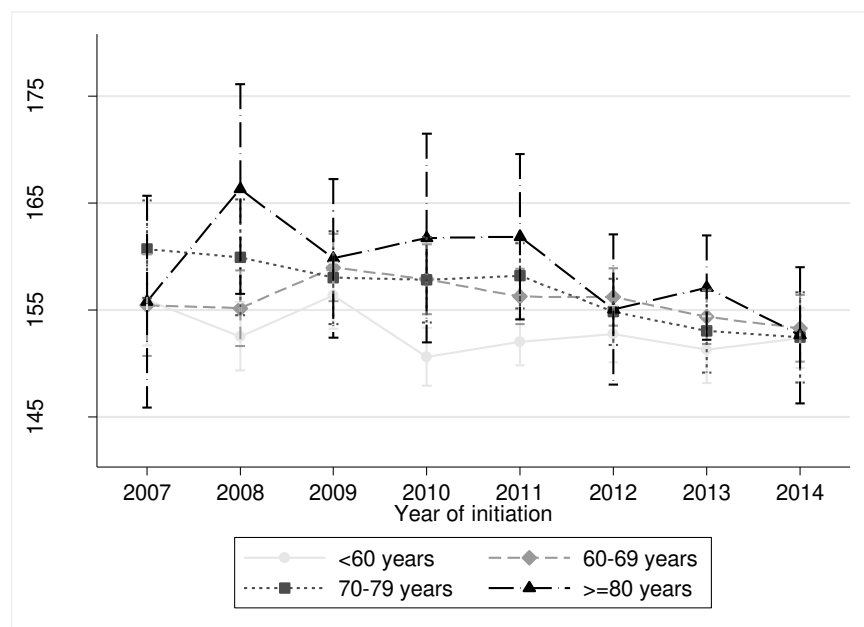

(B)

Ambrož M et al. Changes in blood pressure thresholds for initiating antihypertensive medication in diabetes patients with diabetes. *BMJ Open* 2020

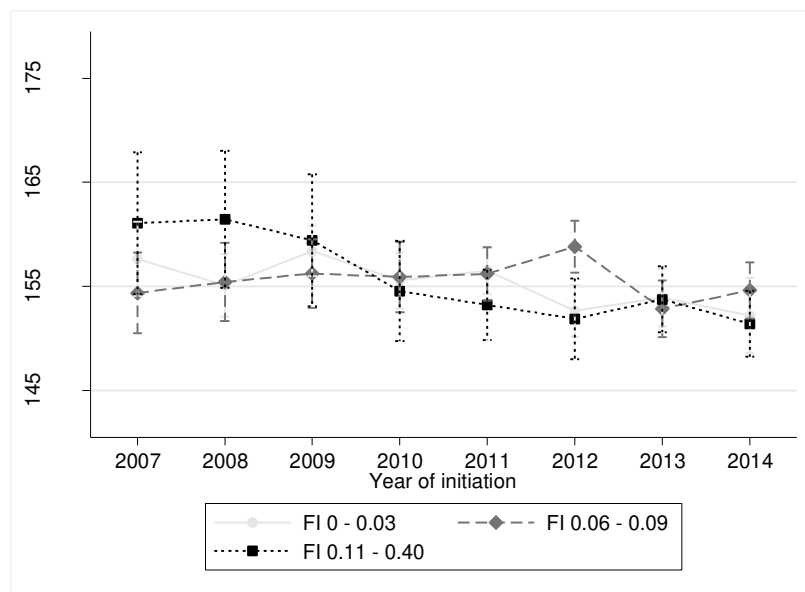

(C)

**Supplementary Figure 2:** Mean of last two systolic blood pressure (BP) levels with 95% CIs before/at antihypertensive treatment initiation (A) through the years; (B) through the years in different age groups and (C) through the years in different frailty groups.

**Supplementary Table 2:** Influence of calendar year and age or frailty on blood pressure thresholds (multilevel analysis) using the mean of last two systolic blood pressure measurements

|                            | $\beta$ | 95% CI               | P      |
|----------------------------|---------|----------------------|--------|
| <b>AGE*</b>                |         |                      |        |
| Calendar year              | -0.894  | -2.307, 0.519        | 0.215  |
| Calendar year <sup>2</sup> | -0.001  | -0.146, 0.148        | 0.993  |
| Age <60 years              | -8.367  | -10.910, -5.824      | <0.001 |
| Age 60 – 69 years          | -4.271  | -6.714, -1.828       | 0.001  |
| Age 70 – 79 years          | -2.921  | -5.349, -0.492       | 0.018  |
| Age $\geq$ 80 years        |         | reference group      |        |
| Interaction year*age       |         | none are significant |        |
| <b>FRAILITY†</b>           |         |                      |        |
| Calendar year              | -0.867  | -2.290, 0.556        | 0.232  |
| Calendar year <sup>2</sup> | -0.013  | -0.161, 0.136        | 0.866  |
| Frailty 0 – 0.03           | -3.501  | -5.390, -1.611       | 0.000  |
| Frailty 0.06 – 0.09        | -1.455  | -3.231, 0.322        | 0.109  |
| Frailty 0.11 – 0.40        |         | reference group      |        |
| Interaction year*frailty   |         | none are significant |        |

The intraclass correlation coefficient (ICC) calculated from the empty model was 0.050.

\* the age model was adjusted for sex, duration of diabetes, number of chronic medication at initiation, number and/or type of glucose lowering therapy, lipid lowering therapy, presence of albuminuria, presence of dyslipidaemia, haemoglobin A1C, history of cardiovascular events, estimated glomerular filtration rate and BMI

† the frailty model was adjusted for sex, duration of diabetes, number and/or type of glucose lowering therapy, lipid lowering therapy and haemoglobin A1C

‡ joint significance of calendar year and calendar year<sup>2</sup> using Wald test

Ambrož M et al. Changes in blood pressure thresholds for initiating antihypertensive medication in diabetes patients with diabetes. *BMJ Open* 2020

### Supplementary material 3

#### Sensitivity analysis using electronic frailty index as a continuous variable

There were no statistically significant differences in blood pressure thresholds between patients with different frailty (Supplementary table 3).

**Supplementary Table 3:** Influence of calendar year and frailty on blood pressure thresholds (multilevel analysis), using frailty index as a continuous variable

|                             | $\beta$ | 95% CI               | P     |                     |
|-----------------------------|---------|----------------------|-------|---------------------|
| <b>FRAILITY<sup>†</sup></b> |         |                      |       |                     |
| Calendar year               | 0.211   | -1.135, 1.557        | 0.759 | <0.001 <sup>‡</sup> |
| Calendar year <sup>2</sup>  | -0.147  | -0.288, -0.007       | 0.039 |                     |
| Frailty                     | -9.324  | -20.747, 2.098       | 0.110 |                     |
| Interaction year*frailty    |         | none are significant |       |                     |

<sup>†</sup> the frailty model was adjusted for sex, duration of diabetes, number and/or type of glucose lowering therapy, lipid lowering therapy and haemoglobin A1C

<sup>‡</sup> joint significance of calendar year and calendar year<sup>2</sup> using Wald test

Ambrož M et al. Changes in blood pressure thresholds for initiating antihypertensive medication in diabetes patients with diabetes. *BMJ Open* 2020

#### Supplementary material 4

**Supplementary Table 4:** Characteristics of included patients: comparison of complete cases and cases with missing values

|                                                      | <b>complete cases</b> | <b>cases with missings</b> |
|------------------------------------------------------|-----------------------|----------------------------|
| Patients; N (%)                                      | 3 545 (74)            | 1 274 (26)                 |
| Females; N (%)                                       | 1 602 (45)            | 675 (52)                   |
| Age in years; mean $\pm$ SD                          | 64 $\pm$ 12           | 65 $\pm$ 13                |
| Frailty index; median (Q1 - Q3)                      | 0.08 (0.06 – 0.11)    | 0.08 (0.03 – 0.11)         |
| SBP at initiation in mmHg; mean $\pm$ SD             | 154 $\pm$ 21          | 158 $\pm$ 23               |
| DBP at initiation in mmHg; mean $\pm$ SD             | 85 $\pm$ 12           | 87 $\pm$ 13                |
| Diabetes duration in years; mean $\pm$ SD            | 5.4 $\pm$ 5.3         | 5.4 $\pm$ 5.5              |
| N of chronic medication at initiation; mean $\pm$ SD | 3.6 $\pm$ 2.4         | 3.5 $\pm$ 2.6              |
| Treated with a lipid lowering drug; N (%)            | 2 134 (60)            | 615 (48)                   |
| Initiated with one antihypertensive; N (%)           | 3 215 (91)            | 1 130 (89)                 |

Ambrož M et al. Changes in blood pressure thresholds for initiating antihypertensive medication in diabetes patients with diabetes. *BMJ Open* 2020

### Supplementary material 5

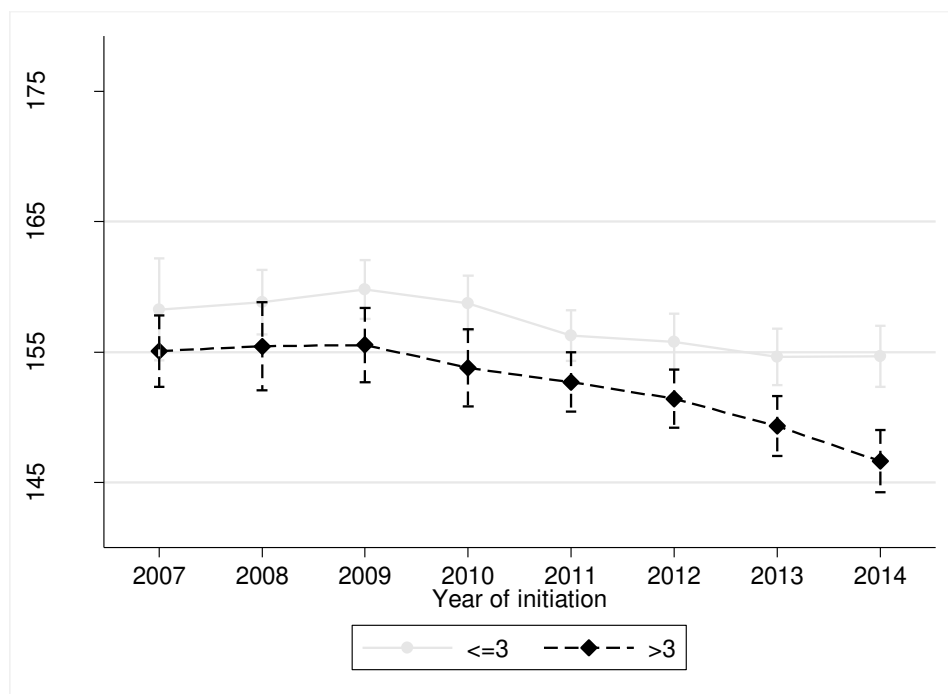

**Supplementary Figure 3:** Mean last systolic blood pressure value with 95% CIs before/at antihypertensive treatment initiation through the years in patients with different number of chronic medication at initiation.

**Supplementary table 5:** Multilevel analysis of number of chronic medication at initiation

|                                         | $\beta$ | 95% CI (min, max)    | P      |
|-----------------------------------------|---------|----------------------|--------|
| <b>Calendar year</b>                    | -0.206  | -1.543, 1.130        | 0.762  |
| <b>Calendar year<sup>2</sup></b>        | -0.101  | -0.240, 0.037        | 0.152  |
| <b>3 or less chronic medication</b>     |         | reference group      |        |
| <b>More than 3 chronic medication</b>   | -4.107  | -5.428, -2.785       | <0.001 |
| <b>Interaction year*N of medication</b> |         | none are significant |        |

The model was adjusted for sex, duration of diabetes, number and/or type of glucose lowering therapy, lipid lowering therapy, presence of albuminuria, presence of dyslipidaemia, haemoglobin A1C, estimated glomerular filtration rate and BMI.

‡ joint significance of calendar year and calendar year<sup>2</sup> using Wald test
